# Supplementary material for: A thermo- and pH-responsive poly(N-isopropylacrylamide)–Mn–ZnS nanocomposite for controlled release and real-time photoluminescence tracking of doxorubicin
Source: Royal Society of Chemistry journal article supplement (doi:10.1039/c6ra10395b), 2016-01-01
Supplement: c6ra10395b1.pdf [file c6ra10395b1.pdf]

## Electronic Supplementary Information

### **Thermo- and pH-Responsive Poly(N-isopropylacrylamide)-Mn-ZnS Nanocomposite for Controlled Release and Real-Time Photoluminescence Tracking of Doxorubicin**

Ruo-Mei Wang,<sup>a</sup> Qian Liu,<sup>b</sup> Yu Zhang,<sup>a</sup> Zhangyong Hong<sup>b</sup> and He-Fang Wang<sup>\*a,b</sup>

*<sup>a</sup>Research Center for Analytical Sciences, College of Chemistry, Nankai University. <sup>a</sup>Key Laboratory of Biosensing and Molecular Recognition, <sup>b</sup>State Key Laboratory of Medicinal Chemical Biology, <sup>a</sup>Collaborative Innovation Center of Chemical Science and Engineering (Tianjin), 94 Weijin Road, Tianjin 300071, China*

*\*E-mail: wanghefang@nankai.edu.cn*

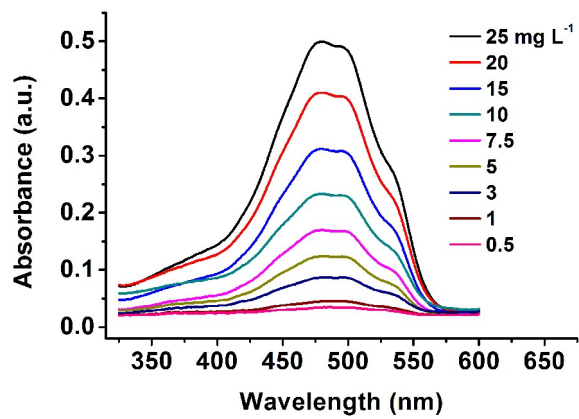

**Fig. S1.** The UV-vis spectra of standard Dox·HCl solutions.

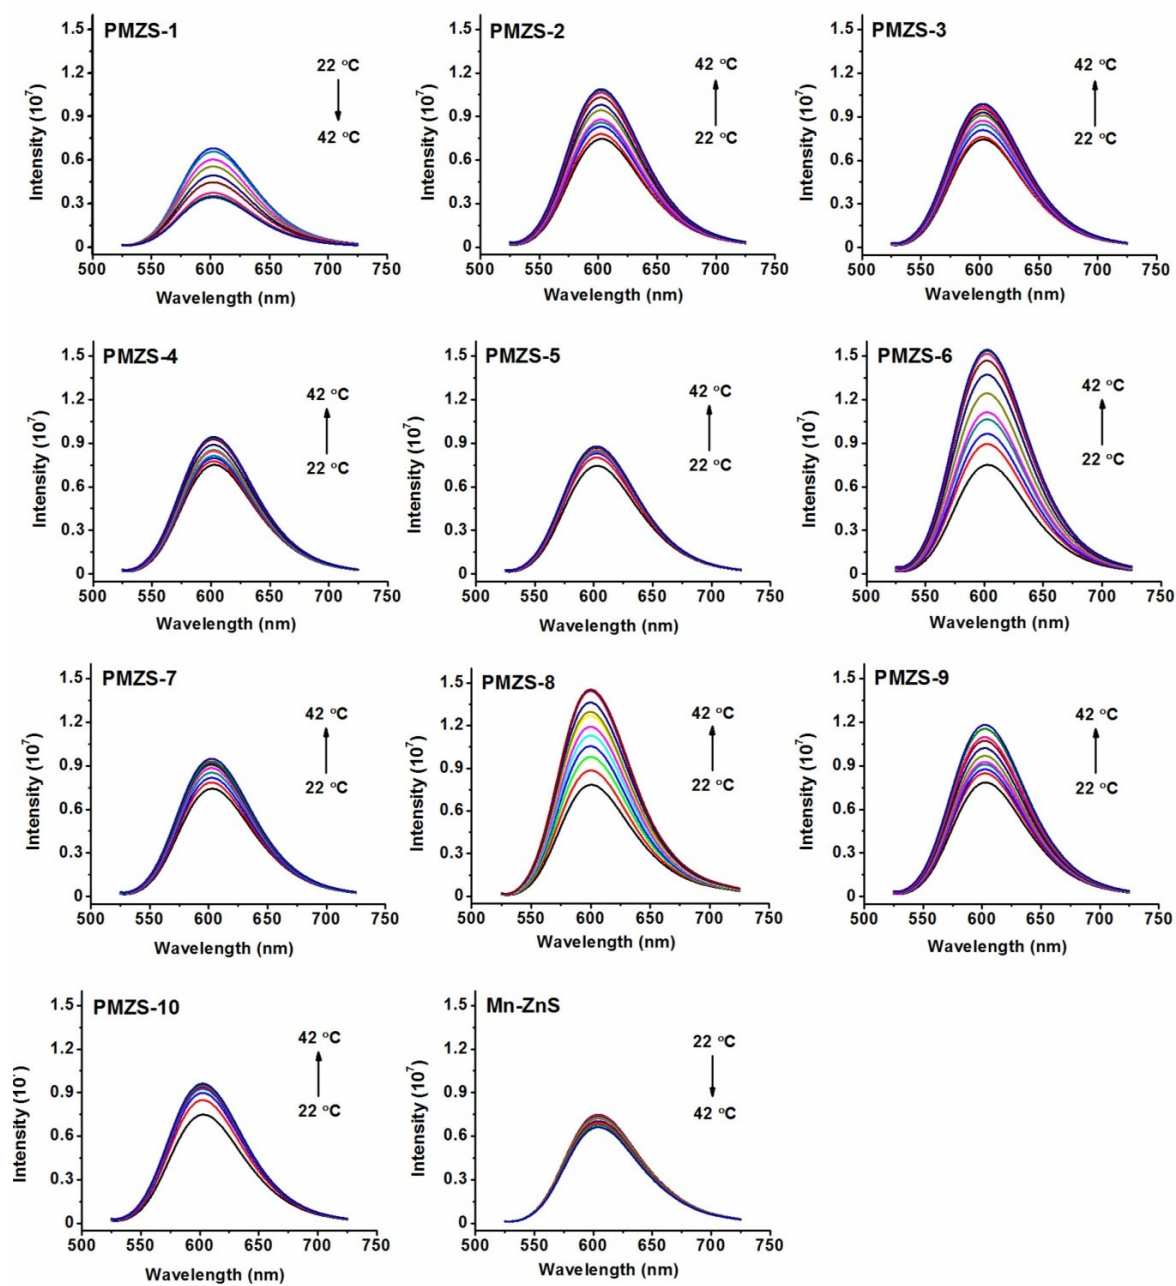

**Fig. S2.** Temperature-dependent PL spectra of PMZS nanocomposites (with equivalent Mn-ZnS of  $0.015 \text{ g L}^{-1}$ ) and raw Mn-ZnS ( $0.015 \text{ g L}^{-1}$ ) in MES-Tris buffers ( $10 \text{ mM}$ , pH 6.5) excited at  $320 \text{ nm}$ .

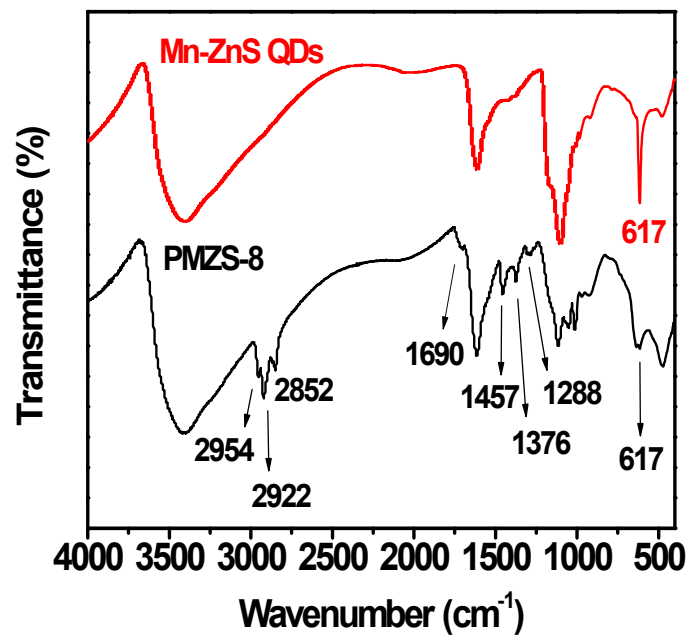

Fig. S3. FT-IR spectra of PMZS-8 and raw Mn-ZnS QDs.

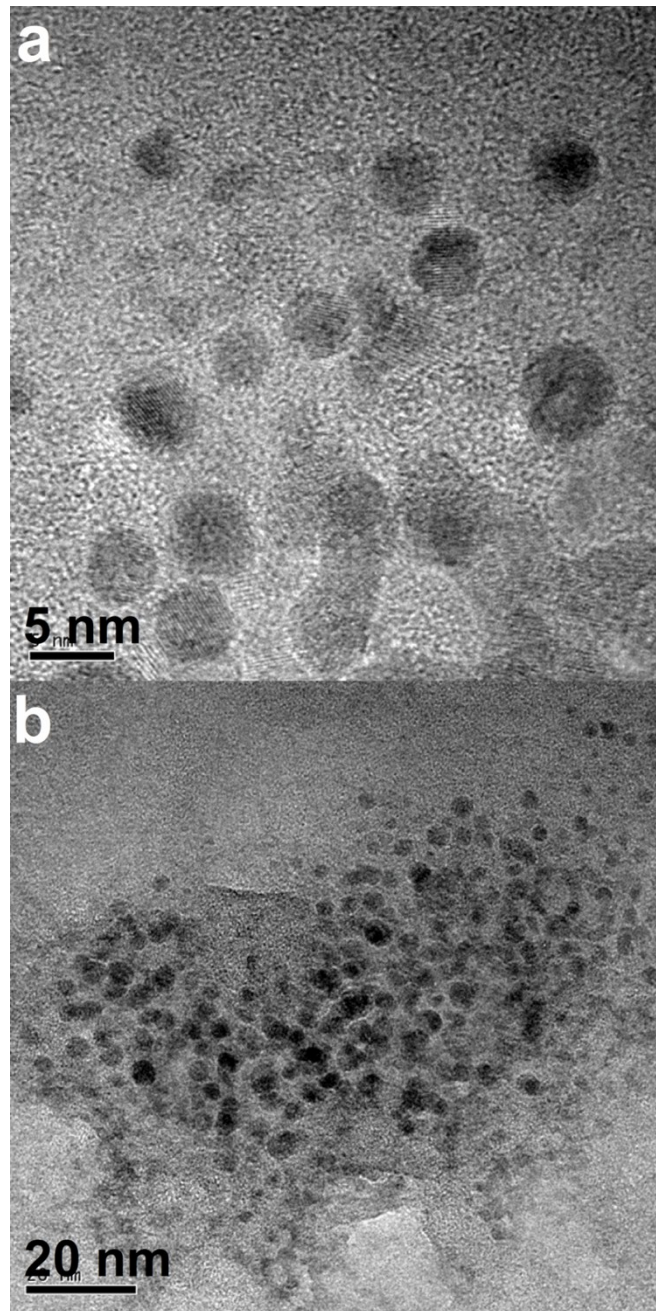

**Fig. S4.** TEM images of PMZS-8.

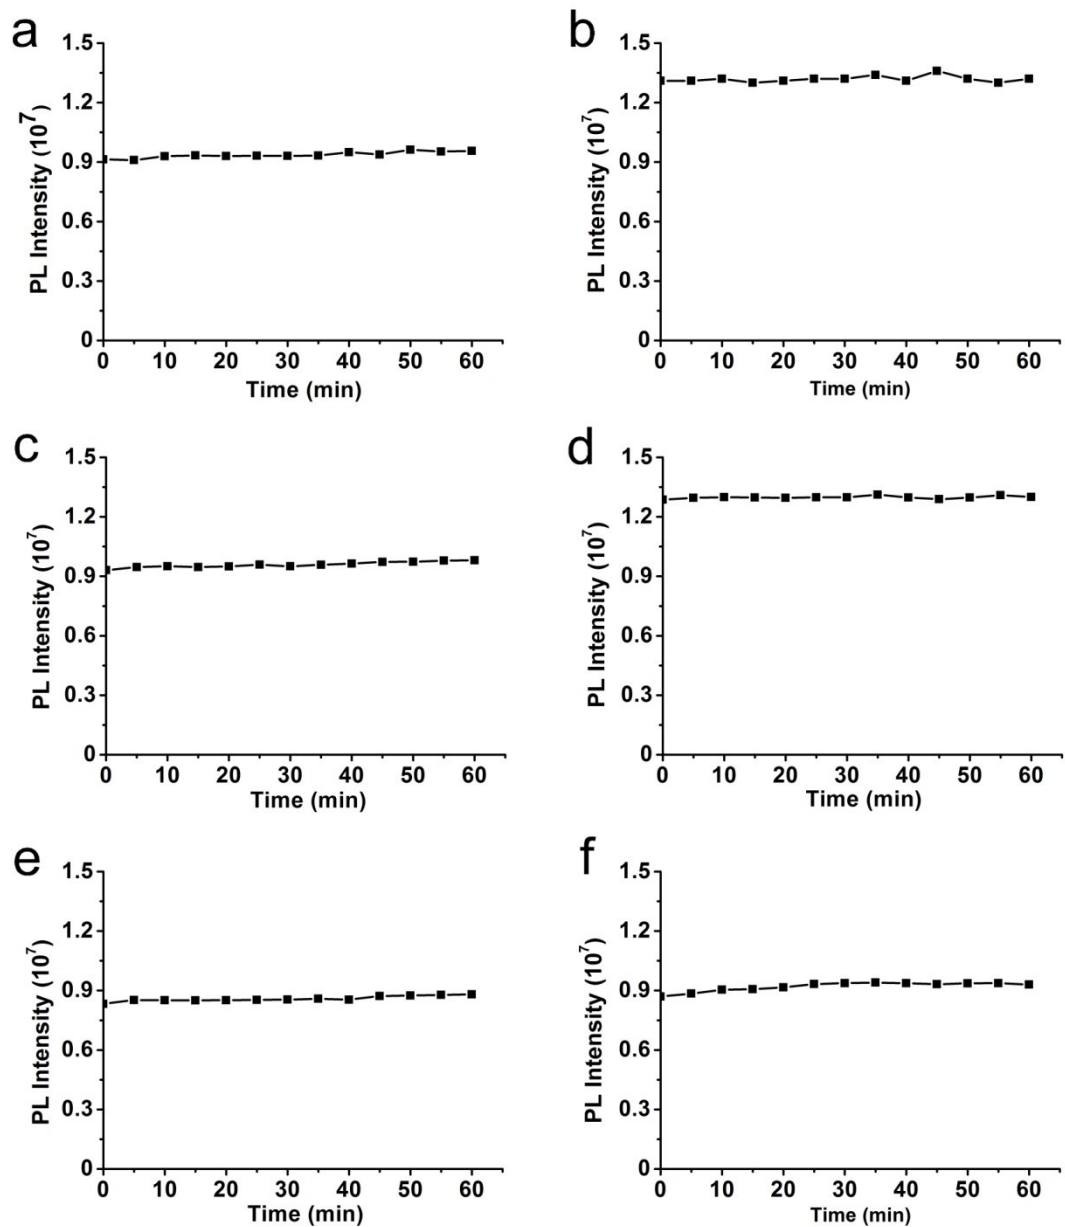

**Fig. S5.** Stability of 600 nm emission of PMZS-8 ( $0.06 \text{ g L}^{-1}$ ) at 25 °C in (a) pH 5.5; (c) pH 6.5; (e) pH 7.4 and 37 °C in (b) pH 5.5, (d) pH 6.5, (f) pH 7.4 MES-Tris buffer (10 mM)

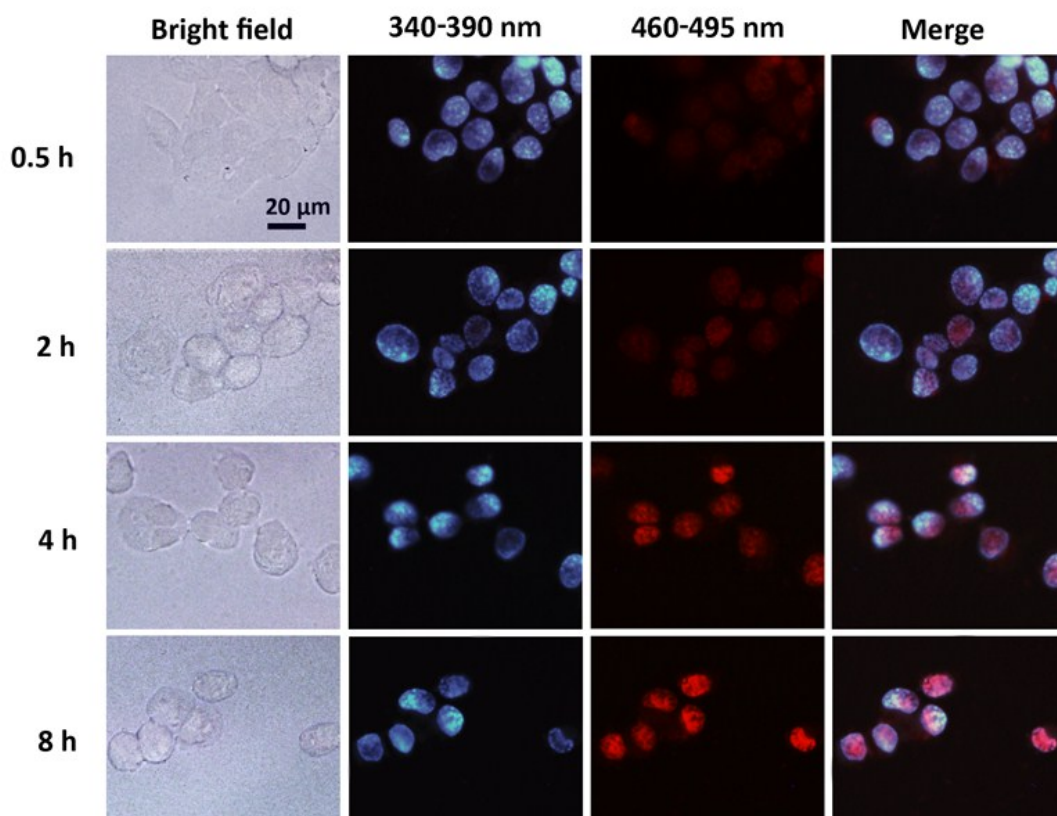

**Fig. S6.** Fluorescence imaging of 4T1 cells exposed to free Dox (5  $\mu$ M) for 0.5, 2, 4 and 8 h. The pictures were taken by a fluorescence microscope in bright field, under excitation of 340-390 nm (for DAPI) and 460-495 nm (for Dox).

**Table S1**

**Decay Parameters of PMZS-8 at Different Temperatures Obtained by 2-Exponential Fitting <sup>[a]</sup>**

| T (°C) | $\tau_1$ ( $\mu$ s) | A <sub>1</sub> (%) | $\tau_2$ ( $\mu$ s) | A <sub>2</sub> (%) | $\chi^2$ | $\tau_{av}$ ( $\mu$ s) |
|--------|---------------------|--------------------|---------------------|--------------------|----------|------------------------|
| 25     | 500.6±36.2          | 70.5±3.4           | 2884±207            | 29.5±1.9           | 0.9313   | 1205±87                |
| 30     | 434.7±37.1          | 71.8±4.7           | 2525±181            | 28.2±1.9           | 0.8431   | 1024±78                |
| 34     | 483.6±27.2          | 75.9±2.3           | 3381±322            | 24.1±1.2           | 1.068    | 1181±98                |
| 37     | 487.5±44.2          | 73.1±4.0           | 2731±287            | 26.9±2.5           | 0.9987   | 1090±110               |

<sup>[a]</sup>  $F(t) = A_1e^{-t/\tau_1} + A_2e^{-t/\tau_2}$

The decay curve of the RTP emission of 0.06g L<sup>-1</sup> PMZS-8 at different temperatures was excited by N<sub>2</sub> laser at 320 nm, and scanned three times of emission at 600 nm (300 channels). The emission slit at 20 nm with integration time of 25  $\mu$ s.



**Table S2**

**The Loading Capacity, Release Condition and Accumulative Release Amount of Dox by  
Some PNIPAm-Based Nanocarriers**

| Nanocarriers                          | Loading capacity (%) | Release condition       | Accumulative Release amount (%) | Ref       |
|---------------------------------------|----------------------|-------------------------|---------------------------------|-----------|
| PNIPAm-Mn-ZnS                         | 15.20                | pH 5.5, 37 °C, 24 h     | 81.50                           | This Work |
| UCNPs@mSiO <sub>2</sub> -P(NIPAm-MAA) | 8.60                 | pH 5.0, 45 °C, 20 h     | 52.20                           | 1         |
| MSN-NH <sub>2</sub> @colipid          | 29.51                | pH 5.5, 37 °C, 24 h     | 76.80                           | 2         |
| PNDGPs                                | 20.70                | pH 5.5, 37 °C, 48 h     | ~33.00                          | 3         |
| POEGMA-b-P(NIPAm-NBA-Gd)              | 4.90                 | pH 5.0, 37 °C, UV, 12 h | ~73.00                          | 4         |
| M-MSN-P(NIPAm-MAA)                    | 21.50                | pH 5.0, 37 °C, 24 h     | 80.20                           | 5         |
| Au-nanocage@mSiO <sub>2</sub> @PNIPAm | 23.50                | pH 5.0, NIR, 8 h        | 78.90                           | 6         |
| P(MAA-DVB)-g-PNIPAm                   | 12.90                | pH 5.6, 37 °C, 72 h     | ~50.00                          | 7         |

UCNPs@mSiO<sub>2</sub>-P(NIPAm-MAA): NaYF<sub>4</sub>:Yb<sup>3+</sup>/Er<sup>3+</sup> core (UCNPs) with poly(N-isopropylacrylamide-co-methacrylic acid) gated mesoporous silica shell

MSN-NH<sub>2</sub>@colipid: soyphosphatidylcholine-poly(N-isopropylacrylamide-co-methacrylic acid-co-octadecyl acrylate) bilayer coated mesoporous silica nanoparticles

PNDGPs: amphiphilic polyphosphazenes with poly(N-isopropylacrylamide-co-N,N-dimethylacrylamide) and ethyl glycinate side groups

POEGMA-b-P(NIPAm-NBA-Gd): poly[oligo(ethylene glycol) monomethyl ether methacrylate]-b-poly(N-isopropylacrylamide-co-o-nitrobenzyl acrylate-co-Gd<sup>3+</sup>) diblock copolymer

M-MSN-P(NIPAm-MAA): poly(N-isopropylacrylamide-co-methacrylic acid) coated magnetic mesoporous silica nanoparticles

Au-nanocage@mSiO<sub>2</sub>@PNIPAm: gold nanocages core with poly(N-isopropylacrylamide) coated mesoporous silica shell

P(MAA-DVB)-g-PNIPAm: nanocapsule with poly(methacrylic acid-co-divinylbenzene) inner shell and poly(N-isopropylacrylamide) grafted chain

## Reference

- 1 X. Zhang, P. Yang, Y. Dai, P. a. Ma, X. Li, Z. Cheng, Z. Hou, X. Kang, C. Li and J. Lin, *Adv. Funct. Mater.*, 2013, **23**, 4067-4078.
- 2 X. Wu, Z. Wang, D. Zhu, S. Zong, L. Yang, Y. Zhong and Y. Cui, *Acs Appl. Mater. Interfaces*, 2013, **5**, 10895-10903.
- 3 L. Y. Qiu, X. L. Wu and Y. Jin, *Pharmaceut. Res.*, 2009, **26**, 946-957.
- 4 Y. Li, Y. Qian, T. Liu, G. Zhang and S. Liu, *Biomacromolecules*, 2012, **13**, 3877-3886.
- 5 B. Chang, X. Sha, J. Guo, Y. Jiao, C. Wanga and W. Yang, *J.Mater. Chem.*, 2011, **21**, 9239-9247.
- 6 J. Yang, D. Shen, L. Zhou, W. Li, X. Li, C. Yao, R. Wang, A. M. El-Toni, F. Zhang and D. Zhao, *Chem. Mater.*, 2013, **25**, 3030-3037.
- 7 L. Chen, Z. Peng, Z. Zeng, Y. She, J. Wei and Y. Chen, *J. Polym. Sci. Pol. Chem.*, 2014, **52**, 2202-2216.
